# Supplementary material
Source: publisher figshare collection journal article supplement (https://frontiersin.figshare.com/ndownloader/files/11707376)
Supplement: Supplementary file [file 11707376]

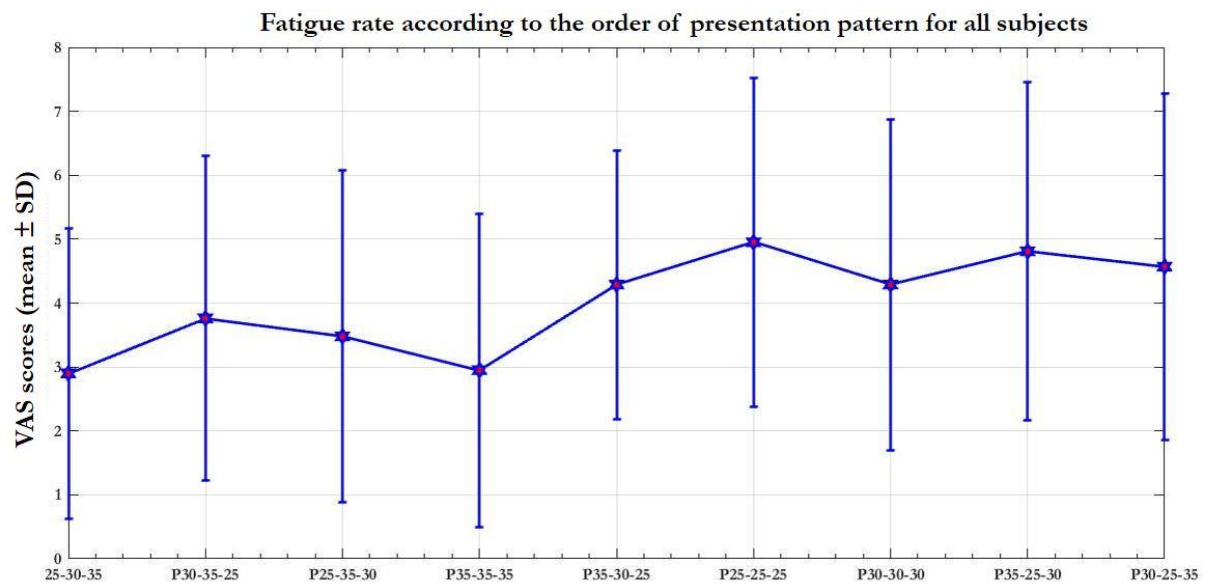

**Supplementary figure S6: VAS scores of the subjective fatigue rate according the order of stimulus presentation pattern.**
